# Supplementary material
Source: PubMed Central journal article supplement (PMC7524953)
Supplement: 13770_2020_257_MOESM1_ESM.pdf [file 13770_2020_257_MOESM1_ESM.pdf]

Suppl. 1

| Group            |      | Growth factor release profile | Vitro         | Subcutaneous | Calvarial defect |
|------------------|------|-------------------------------|---------------|--------------|------------------|
| Negative control | -    | X                             | Culture plate | X            | Empty defect     |
| Control          | S    | X                             | O             | O            | X                |
| Control          | B    | X                             | O             | O            | X                |
| Control          | SB   | X                             | O             | O            | O                |
| Experimental     | SV   | O                             | O             | O            | X                |
| Experimental     | BB   | O                             | O             | O            | X                |
| Experimental     | SVBB | O                             | O             | O            | O                |
